# Supplementary material
Source: MDPI journal article supplement (https://www.mdpi.com/2673-1924/1/3/12)
Supplement: s1 [file s1]

# Supplementary Material

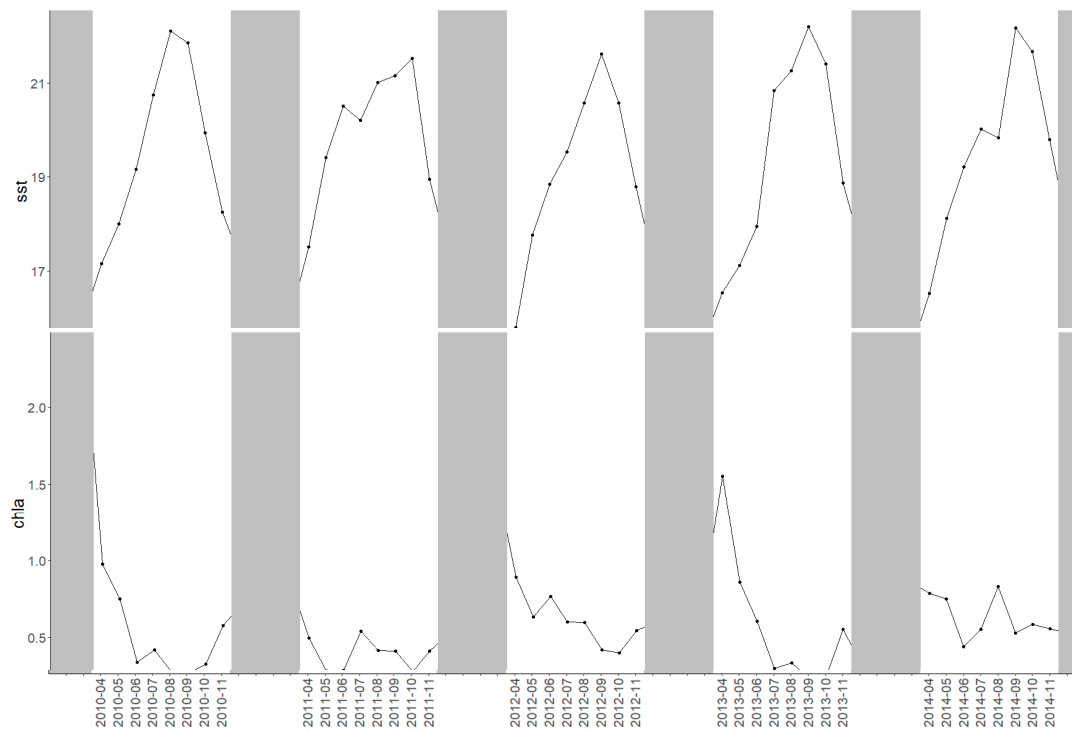

**Figure S1.** Monthly variation of the environmental variables examined: Sea Surface Temperature (SST) and Chlorophyll a (Chla). Grey X-axis breaks represent months with no sampling due to unfavourable winter conditions and thus were excluded from analysis.

## Adults

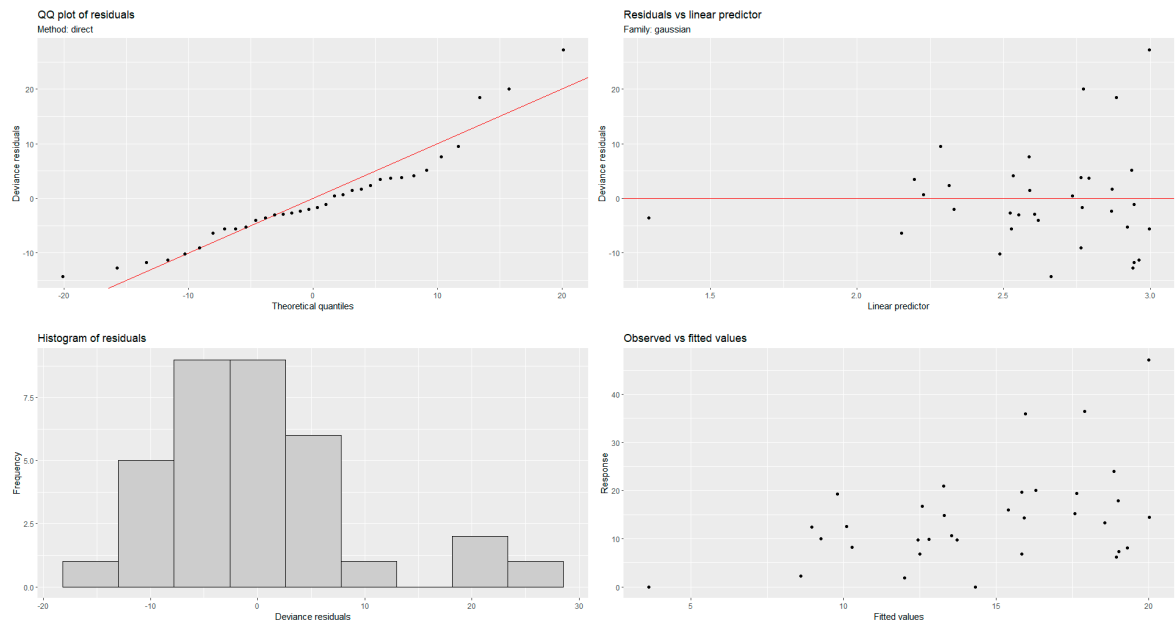

## Juveniles

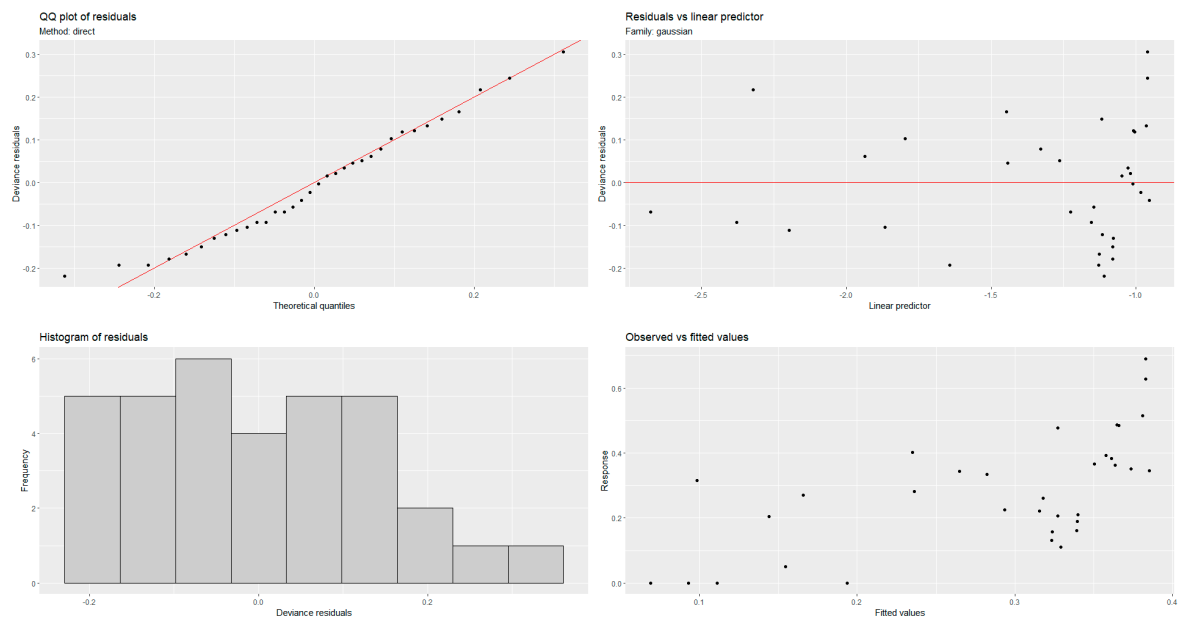

## Calves

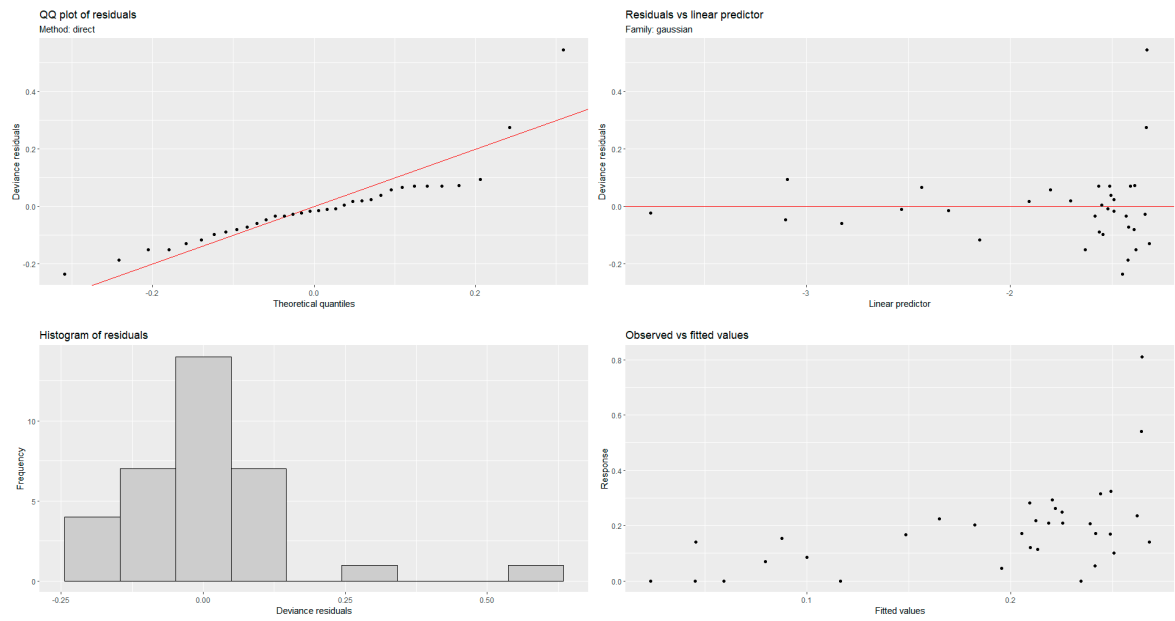

## Newborns

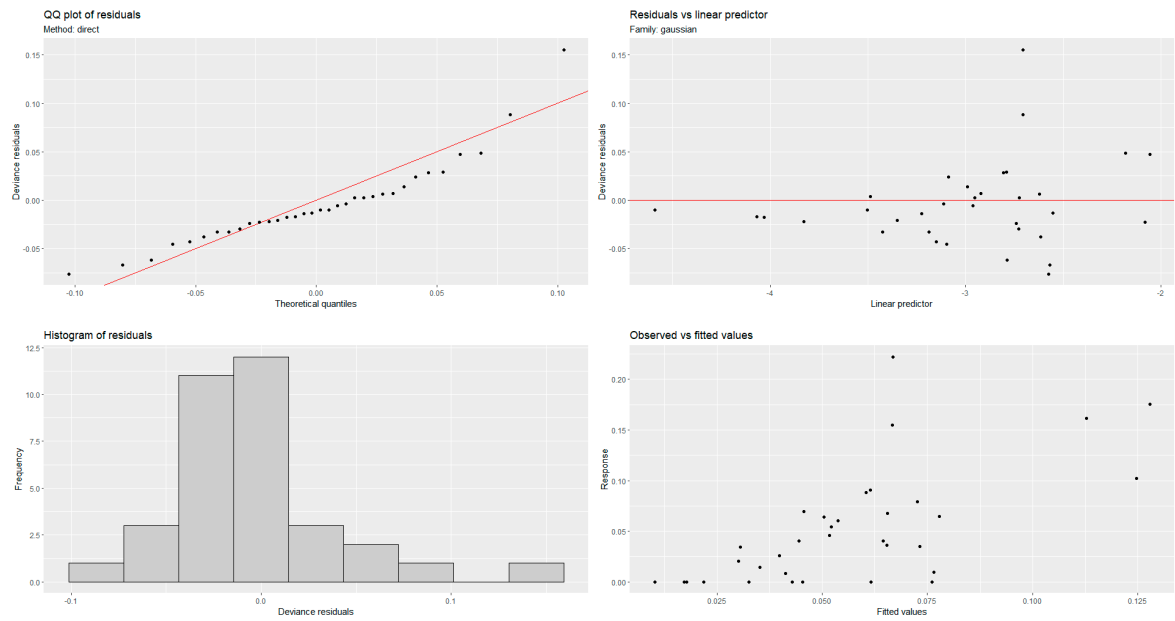

**Figure S2.** Model validation plots of the four categories: Adults, Juveniles, Calves and Newborns.
